# Supplementary material for: Life Cycle Assessment and Impact Correlation Analysis of Fly Ash Geopolymer Concrete
Source: MDPI journal article supplement (doi:10.3390/ma14237375), 2021-12-01
Supplement: s1 [file s1]

## Article

# Life Cycle Assessment and Impact Correlation Analysis of Fly Ash Geopolymer Concrete

Xiaoshuang Shi <sup>1,\*</sup>, Cong Zhang <sup>2</sup>, Yongchen Liang <sup>2</sup>, Jinqian Luo <sup>2</sup>, Xiaoqi Wang <sup>2</sup>, Ying Feng <sup>2</sup>, Yanlin Li <sup>2</sup>, Qingyuan Wang <sup>1,2,3</sup> and Abd El-Fatah Abomohra <sup>4</sup>

- <sup>1</sup> Key Laboratory of Deep Earth Science and Engineering (Ministry of Education), Department of Architecture and Environment, Sichuan University, Chengdu 610065, China; wangqy@scu.edu.cn
- <sup>2</sup> Failure Mechanics and Engineering Disaster Prevention and Mitigation Key Lab of Sichuan Province, Sichuan University, Chengdu 610065, China; zhangcong@stu.scu.edu.cn (C.Z.); liangyc@stu.scu.edu.cn (Yongchen Liang); luojinqian@stu.scu.edu.cn (J.L.); wangxqi0126@163.com (X.W.); phyfing@stu.scu.edu.cn (Y.F.); tliyanlin@163.com (Yanlin Li)
- <sup>3</sup> Department of Mechanical Engineering, Chengdu University, Chengdu 610106, China
- <sup>4</sup> Department of Environmental Engineering, School of Architecture and Civil Engineering, Chengdu University, Chengdu 610106, China; abomohra@cdu.edu.cn
- \* Correspondence: shixs@scu.edu.cn

**Citation:** Shi, X.; Zhang, C.; Liang, Y.; Luo, J.; Wang, X.; Feng, Y.; Li, Y.; Wang, Q.; Abomohra, A.E.-F. Life Cycle Assessment and Impact Correlation Analysis of Fly Ash Geopolymer Concrete. *Materials* **2021**, *14*, 7375. <https://doi.org/10.3390/ma14237375>

Academic Editors: Thomas N. Kerestedjian and Alexander Karamanov

Received: 20 October 2021

Accepted: 29 November 2021

Published: 1 December 2021

**Publisher's Note:** MDPI stays neutral with regard to jurisdictional claims in published maps and institutional affiliations.

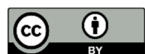

**Copyright:** © 2021 by the authors. Licensee MDPI, Basel, Switzerland. This article is an open access article distributed under the terms and conditions of the Creative Commons Attribution (CC BY) license (<http://creativecommons.org/licenses/by/4.0/>).

Table S1. Characteristics of aggregates.

| Material          | Maximum diameter<br>(mm) | Linear mean diameter<br>(mm) | Stacking density<br>(kg/m <sup>3</sup> ) | Apparent density<br>(kg/m <sup>3</sup> ) |
|-------------------|--------------------------|------------------------------|------------------------------------------|------------------------------------------|
| Coarse aggregates | 22                       | 12.38                        | 1479                                     | 2632                                     |
| Fine aggregates   | 4                        | 0.33                         | 1342                                     | 2381                                     |

Table S2. Characteristics and chemical components of class F fly ash.

| Composition  | SiO <sub>2</sub> | Al <sub>2</sub> O <sub>3</sub> | CaO  | Fe <sub>2</sub> O <sub>3</sub> | MgO  | K <sub>2</sub> O | P <sub>2</sub> O <sub>5</sub> | TiO <sub>2</sub> | Na <sub>2</sub> O |
|--------------|------------------|--------------------------------|------|--------------------------------|------|------------------|-------------------------------|------------------|-------------------|
| Quantity (%) | 74.18            | 9.44                           | 5.53 | 4.22                           | 2.48 | 1.46             | 1.41                          | 0.96             | 0.32              |

Table S3. Mix proportion of fly ash GPC under different strength grades (kg/m<sup>3</sup>).

| Strength grades | C <sub>NaOH</sub><br>(mol/L) | SS/SH | S/F  | CA   | S       | FA     | Water  | NaOH  | Na <sub>2</sub> SiO <sub>3</sub> |
|-----------------|------------------------------|-------|------|------|---------|--------|--------|-------|----------------------------------|
| C40             | Mix 1                        | 8.00  | 2.00 | 0.40 | 1212.00 | 544.00 | 460.00 | 45.30 | 122.70                           |
|                 | Mix 2                        | 8.00  | 2.50 | 0.44 | 1201.00 | 539.00 | 460.00 | 42.20 | 142.90                           |
|                 | Mix 3                        | 10.00 | 4.00 | 0.48 | 1186.00 | 533.00 | 460.00 | 30.30 | 176.60                           |
|                 | Mix 4                        | 10.00 | 3.00 | 0.52 | 1174.00 | 527.00 | 460.00 | 40.00 | 180.90                           |
| C60             | Mix 5                        | 12.00 | 1.50 | 0.38 | 1180.00 | 530.00 | 500.00 | 48.60 | 114.00                           |
|                 | Mix 6                        | 14.00 | 4.00 | 0.40 | 1212.00 | 544.00 | 460.00 | 21.90 | 147.20                           |
|                 | Mix 7                        | 12.00 | 2.50 | 0.41 | 1132.00 | 508.00 | 540.00 | 40.20 | 157.10                           |
|                 | Mix 8                        | 12.00 | 2.50 | 0.52 | 1174.00 | 527.00 | 460.00 | 43.70 | 170.90                           |
| C70             | Mix 9                        | 12.00 | 1.50 | 0.35 | 1152.00 | 518.00 | 540.00 | 48.56 | 114.00                           |
|                 | Mix10                        | 12.00 | 2.00 | 0.35 | 1152.00 | 518.00 | 540.00 | 40.47 | 126.67                           |
|                 | Mix11                        | 14.00 | 3.00 | 0.44 | 1201.00 | 539.00 | 460.00 | 29.09 | 151.30                           |
|                 | Mix12                        | 12.00 | 2.00 | 0.48 | 1187.00 | 533.00 | 460.00 | 46.86 | 146.67                           |

<sup>1</sup> C<sub>NaOH</sub>= NaOH concentration.<sup>2</sup> SS/SH= Sodium silicate solution: Sodium hydroxide.<sup>3</sup> S/F= Alkali activator solution: Fly ash.<sup>4</sup> CA= Coarse aggregates, S= Fine aggregates.<sup>5</sup> FA= Fly ash.Table S4. Mix proportion of OPC concrete under different strength grades (kg/m<sup>3</sup>).

| Strength grades | CA    | S       | Cement | Water  | Concrete reducing<br>water agent |
|-----------------|-------|---------|--------|--------|----------------------------------|
| C40             | Mix 1 | 1215.00 | 572.00 | 415.00 | 166.00                           |
|                 | Mix 2 | 1104.00 | 736.00 | 440.00 | 170.00                           |
|                 | Mix 3 | 1301.00 | 481.00 | 513.00 | 205.00                           |
|                 | Mix 4 | 1301.00 | 481.00 | 513.00 | 205.00                           |
| C60             | Mix 5 | 1198.00 | 617.00 | 486.00 | 170.00                           |
|                 | Mix 6 | 1151.00 | 647.00 | 494.00 | 158.00                           |
|                 | Mix 7 | 1044.00 | 696.00 | 500.00 | 160.00                           |
|                 | Mix 8 | 1145.00 | 618.00 | 510.00 | 163.00                           |
| C70             | Mix 9 | 1125.00 | 633.00 | 475.00 | 166.00                           |
|                 | Mix10 | 1104.00 | 595.00 | 531.00 | 170.00                           |
|                 | Mix11 | 1250.00 | 670.00 | 550.00 | 210.00                           |
|                 | Mix12 | 1098.00 | 652.00 | 556.00 | 156.00                           |
